# Supplementary material for: Cognitive dysfunction in adolescents with chronic fatigue: a cross-sectional study
Source: HighWire-hosted journal article supplement (doi:10.1136/archdischild-2014-306764), 2015-03-19
Supplement: archdischild-2014-306764supp_tables.pdf [file archdischild-2014-306764supp_tables.pdf]

**eTable 1 The number and percentage in the Chronic fatigue group and CFS (CDC) subgroup performing more than 1 SD poorer than the Healthy Control group or Normative data.**

| Neurocognitive measure                | Chronic fatigue group (N=120) |                | CFS (CDC) subgroup (N=88) |                |
|---------------------------------------|-------------------------------|----------------|---------------------------|----------------|
|                                       | HC                            | Normative data | HC                        | Normative data |
| Processing speed <sup>1</sup> (%)     | 37 (31)                       | 46 (38)        | 27 (31)                   | 36 (41)        |
| Working memory <sup>2</sup> (%)       | 48 (40)                       | 71 (60)        | 37 (42)                   | 55 (63)        |
| Cognitive inhibition <sup>1</sup> (%) | 33 (28)                       | 35 (29)        | 26 (30)                   | 26 (30)        |
| Total recall <sup>3</sup> (%)         | 36 (30)                       | 37 (31)        | 29 (33)                   | 29 (33)        |
| BRIEF GEC <sup>4</sup> (%)            | 77 (65)                       | 103 (87)       | 60 (68)                   | 77 (88)        |

Normative data references:

<sup>1</sup> Delis D, Kaplan E, & Kramer, J. (2001) Delis-Kaplan Executive Function System (D-KEFS) (Norwegian version). Stockholm, Sweden: Pearson System.

<sup>2</sup> Wechsler, D. (2004). Wechsler Intelligence Scale for Children – Fourth edition (Norwegian version). Stockholm, Sweden: The Psychological Corporation.

<sup>3</sup> Holmèn A, Juuhl-Langseth M, Thormodsen R, et al. Neuropsychological Profile in Early-Onset Schizophrenia-Spectrum Disorders: Measured With the MATRIVS Battery. *Schizophr Bull* 2010;36(4):852-59.

<sup>4</sup> Hovik KJ, Egeland J, Isquith PK, et al. Distinct Patterns of Everyday Executive Function Problems Distinguish Children With Tourette Syndrome From Children With ADHD or Autism Spectrum Disorders. *J Att Dis* Published Online First 2014; DOI 10.1177/1087054714550336.

**eTable 2 Multivariate analyses of the relations between cognitive measures as dependent variables and group allocation (CFS (CDC) subgroup vs. Healthy Controls), depression symptoms (MFQ), anxiety traits (STAI-T) and sleep index (KSQ) as independent variables.**

| Dependent variable                  | Regression        | Independent variables | B (CI)            |        | p-value | R <sup>2</sup> |
|-------------------------------------|-------------------|-----------------------|-------------------|--------|---------|----------------|
|                                     |                   |                       |                   | Beta   |         |                |
| Processing speed                    | Multivariate 1    | Group                 | 2.8 (0.1, 5.5)    | 0.206  | 0.043   | 0.08           |
|                                     |                   | MFQ                   | -0.06 (-0.2, 0.5) | -0.108 |         |                |
|                                     | Multivariate 2    | Group                 | 2.7 (-0.07, 5.5)  | 0.198  | 0.056   | 0.08           |
| STAI-T                              | -0.07 (-0.2, 0.1) | 0.116                 | 0.262             |        |         |                |
| Working memory                      | Multivariate 3    | Group                 | 4.0 (1.0, 7.1)    | 0.295  | 0.010   | 0.07           |
|                                     |                   | KSQ                   | -0.3 (-1.5, 0.9)  | -0.055 |         |                |
|                                     | Multivariate 1    | Group                 | -2.2 (-3.7, -0.7) | -0.287 | 0.004   | 0.14           |
| MFQ                                 | 0.05 (-0.02, 0.1) | 0.144                 | 0.140             |        |         |                |
| CWIT<br>Cognitive Inhibition        | Multivariate 2    | Group                 | -2.3 (-3.9, -0.8) | -0.301 | 0.003   | 0.14           |
|                                     |                   | STAI-T                | 0.04 (-0.3, 0.1)  | 0.109  |         |                |
|                                     | Multivariate 3    | Group                 | -2.0 (-3.7, -0.3) | -0.256 | 0.020   | 0.14           |
| KSQ                                 | -0.5 (-1.2, 0.2)  | -0.161                | 0.140             |        |         |                |
| HVLt-R<br>Total Recall              | Multivariate 1    | Group                 | 5.9 (-1.0, 12.7)  | 0.174  | 0.093   | 0.04           |
|                                     |                   | MFQ                   | -0.07(-0.4, 0.2)  | -0.048 |         |                |
|                                     | Multivariate 2    | Group                 | 5.2(-1.8, 12.2)   | 0.154  | 0.144   | 0.04           |
| STAI-T                              | -0.1(-0.5, 0.2)   | -0.082                | 0.433             |        |         |                |
| BRIEF<br>Global Executive Composite | Multivariate 3    | Group                 | 5.8 (-1.9, 13.4)  | 0.172  | 0.136   | 0.04           |
|                                     |                   | KSQ                   | 0.6 (-2.5, 3.6)   | 0.041  |         |                |
|                                     | Multivariate 1    | Group                 | -1.8(-3.5, -0.07) | -0.212 | 0.041   | 0.04           |
| MFQ                                 | -0.01(-0.1, 0.06) | -0.029                | 0.779             |        |         |                |
| BRIEF<br>Global Executive Composite | Multivariate 2    | Group                 | -1.8(-3.5, -0.05) | -0.214 | 0.043   | 0.04           |
|                                     |                   | STAI-T                | -0.1(-0.09, 0.07) | -0.031 |         |                |
|                                     | Multivariate 3    | Group                 | -2.3(-4.2, 0.4)   | -0.271 | 0.019   | 0.05           |
| KSQ                                 | 0.4(-0.4, 1.2)    | 0.117                 | 0.310             |        |         |                |
| BRIEF<br>Global Executive Composite | Multivariate 1    | Group                 | 10.1(5.9, 14.3)   | 0.437  | <0.001  | 0.26           |
|                                     |                   | MFQ                   | -0.1(-0.3, 0.05)  | -0.131 |         |                |
|                                     | Multivariate 2    | Group                 | 8.8(4.5, 13.0)    | 0.380  | <0.001  | 0.29           |
| STAI-T                              | -0.2(-0.4, -0.05) | -0.230                | 0.014             |        |         |                |
| BRIEF<br>Global Executive Composite | Multivariate 3    | Group                 | 8.5(3.8, 13.2)    | 0.367  | <0.001  | 0.28           |
|                                     |                   | KSQ                   | 2.0(0.1, 3.9)     | 0.213  |         |                |
